# Supplementary material
Source: HighWire-hosted journal article supplement (https://www.rcpjournals.org/highwire/filestream/11672/field_highwire_adjunct_files/0/S4_Patient_satisfaction_form.pdf)
Supplement: S4_Patient_satisfaction_form.pdf [file S4_Patient_satisfaction_form.pdf]

#### S4. Patient satisfaction form

##### Satisfaction Survey Telecommunications

Thank you for completing this questionnaire. Please circle the option which you most agree with:

1) I feel my expectations have been met.

|                   |          |                            |       |                |
|-------------------|----------|----------------------------|-------|----------------|
| Strongly disagree | Disagree | Neither agree nor disagree | Agree | Strongly agree |
|-------------------|----------|----------------------------|-------|----------------|

2) I feel safer having workforce abide by 2 metre social distancing via telecommunications.

|                   |          |                            |       |                |
|-------------------|----------|----------------------------|-------|----------------|
| Strongly disagree | Disagree | Neither agree nor disagree | Agree | Strongly agree |
|-------------------|----------|----------------------------|-------|----------------|

3) I feel satisfied with the care I have received.

|                   |          |                            |       |                |
|-------------------|----------|----------------------------|-------|----------------|
| Strongly disagree | Disagree | Neither agree nor disagree | Agree | Strongly agree |
|-------------------|----------|----------------------------|-------|----------------|

4) Is there anything else you would suggest to improve your experience?
